# Supplementary material for: Application of MS-Based Metabolomic Approaches in Analysis of Starfish and Sea Cucumber Bioactive Compounds
Source: MDPI journal article supplement (doi:10.3390/md20050320), 2022-05-12
Supplement: s1 [file s1]

# Supplementary Materials:

*Review*

## Application of MS-based metabolomic approaches in analysis of starfish and sea cucumber bioactive compounds

Roman S. Popov\*, Natalia V. Ivanchina, Pavel S. Dmitrenok\*

<sup>1</sup> G.B. Elyakov Pacific Institute of Bioorganic Chemistry, Far Eastern Branch of Russian Academy of Sciences, 159 Prospect 100-let Vladivostoku, Vladivostok 690022, Russia; ivanchina@piboc.dvo.ru (N.V.I.)

\* Correspondence: popov\_rs@piboc.dvo.ru (R.S.P.); paveldmt@piboc.dvo.ru (P.S.D.); Tel.: +7-423-231-1132 (P.S.D.)

### Contents

**Table S1.** Instrumental and methodological details of MS-based applications for the analysis of starfish polar steroids and sea cucumber triterpene glycosides.

**Table S2.** Instrumental and methodological details of MS-based applications for the analysis of starfish and sea cucumber lipids.

**Table S3.** Instrumental and methodological details in metabolomics studies of starfish and sea cucumbers.

### Abbreviations

ANOVA, Analysis of variance; APPI, Atmospheric pressure photoionization; BSTFA, N-methyl-N-tert-butyltrimethylsilyltrifluoroacetamide; CC, Column chromatography; CID, Collision-induced dissociation; CSI, Captive spray ionization; EI, Electron ionization; ESI, Electrospray ionization; FAB, Fast atom bombardment; FTICR, Fourier-transform ion cyclotron resonance; GC, Gas chromatography; HESI, Heated electrospray ionization; HILIC, Hydrophilic interaction chromatography; HPLC, High-performance liquid chromatography; HSCCC, High-speed counter-current chromatography; IM, Ion mobility; IT, Ion trap; LC, Liquid chromatography; LLE, Liquid-liquid extraction; LPC, Lysophosphatidylcholine; LPE, Lysophosphatidylethanolamine; NMR, Nuclear magnetic resonance; NPLC, Normal-phase liquid chromatography; MALDI, Matrix-assisted laser desorption/ionization; MS, Mass spectrometry; MS/MS, Tandem mass spectrometry; MSI, Mass spectrometry imaging; MSPD, Matrix solid-phase dispersion; MSTFA, N-methyl-N-(trimethylsilyl)-trifluoroacetamide; MTBE, Methyl tert-butyl ether; nanoESI, Nanoelectrospray; PC, Phosphatidylcholine; PCA, Principal component analysis; PE, Phosphatidylethanolamine; PG, Phosphatidylglycerol; PI, Phosphatidylinositol; PLS-DA, Partial least squares discriminant analysis; PS, Phosphatidylserine; QOrbitrap, Quadrupole-Orbitrap; QTOF, Quadrupole time-of-flight; QQQ, Triple-quadrupole; RPLC, Reverse-phase liquid chromatography; SPE, Solid-phase extraction; TLC-FID, Thin-layer chromatography-flame ionization detector; TMCS, Trimethylchlorosilane; TOF, Time-of-flight; TOF/TOF, Tandem time-of-flight; FT, Fourier transform; UPLC, Ultra-performance liquid chromatography; V<sub>cap</sub>, capillary voltage.

**Table S1.** Instrumental and methodological details of MS-based applications for the analysis of starfish polar steroids and sea cucumber triterpene glycosides.

| Species                       | Research focus                                                                                                                           | Extraction                                                                                                                                                                                                               | Purification and desalting                                                                                                                                                                                                                                                             | Analytical approach | Separation and MS detection conditions                                                                                                                                                                                                                                                                                                                                                                                                                                                                                                                                                                                                                   | Statistical methods | Ref.    |
|-------------------------------|------------------------------------------------------------------------------------------------------------------------------------------|--------------------------------------------------------------------------------------------------------------------------------------------------------------------------------------------------------------------------|----------------------------------------------------------------------------------------------------------------------------------------------------------------------------------------------------------------------------------------------------------------------------------------|---------------------|----------------------------------------------------------------------------------------------------------------------------------------------------------------------------------------------------------------------------------------------------------------------------------------------------------------------------------------------------------------------------------------------------------------------------------------------------------------------------------------------------------------------------------------------------------------------------------------------------------------------------------------------------------|---------------------|---------|
| <b>Asteroidea</b>             |                                                                                                                                          |                                                                                                                                                                                                                          |                                                                                                                                                                                                                                                                                        |                     |                                                                                                                                                                                                                                                                                                                                                                                                                                                                                                                                                                                                                                                          |                     |         |
| <i>Asterias rubens</i>        | Applying of LC-NMR-MS analytical approach for screening of an asterosaponin subfraction and characterization of new compounds            | <u>MSPD</u> : animals were cut into small pieces, mixed with H <sub>2</sub> O and LiChroprep RP-18 phase, ground in a mortar, and transferred into a C18 column; elution with 50% ACN yielded the asterosaponin fraction |                                                                                                                                                                                                                                                                                        | LC-MS               | <u>RPLC</u> : YMC J'sphere ODS L80 column (4.6×250 mm); isocratic elution at 0.05 or 0.5 mL/min flow rate of 20 mM NH <sub>4</sub> HCO <sub>2</sub> in D <sub>2</sub> O/ACN (65.5:34.5, <i>v:v</i> )<br><u>ESI-IT MS (neg)</u> : V <sub>cap</sub> – 3.15 kV; end-plate voltage – 2.35 kV; nebulization with N <sub>2</sub> at 30 psi; dry gas flow – 11 L/min at 300°C                                                                                                                                                                                                                                                                                   | -                   | [84]    |
| <i>A. rubens</i>              | Structural characterization, studying the inter-organ spatial distributions and inter-individual variations of asterosaponin composition | Four animals were dissected into body wall (oral and aboral), gonads, stomach, and pyloric caeca and extracted with 90% MeOH                                                                                             | <u>LLE</u> : partitioned successively against <i>n</i> -hexane, CH <sub>2</sub> Cl <sub>2</sub> , and CHCl <sub>3</sub> ; <u>Column chromatography</u> : Amberlite XAD-4 column (washing with H <sub>2</sub> O and elution with MeOH); <u>LLE</u> : partitioned against <i>i</i> -BuOH | LC-MS<br><br>MALDI  | <u>RPLC</u> : Kinetex C18 column (2.1×100 mm, 2.6 µm); isocratic elution at 0.1 mL/min flow rate and 30 °C of 80% B; A: 0.1% FA in H <sub>2</sub> O; B: MeOH; run time: 15 min<br><u>ESI-OOO MS (neg)</u> : V <sub>cap</sub> – 3.1 kV; cone voltage – 20 V; source temperature – 100 °C; desolvation temperature – 300 °C<br><u>MALDI-QTOF MS (neg)</u> : nitrogen laser (337 nm); matrix – 2,5-DHB in H <sub>2</sub> O/ACN with the addition of <i>N,N</i> -dimethylaniline<br><u>MALDI-TOF/TOF MSI (neg)</u> : carboxymethyl cellulose was used as an embedding medium; Smartbeam II (Nd-YAG, 355 nm) laser; matrix – 2,5-DHB in H <sub>2</sub> O/MeOH | -                   | [85,86] |
| <i>Aphelasterias japonica</i> | Profiling and structural characterization of polar steroid compounds                                                                     | Five fresh animals were chopped and extracted with EtOH                                                                                                                                                                  | <u>SPE</u> : Strata-X (polymeric reversed-phase), 33 µm, 60 mg/3 mL                                                                                                                                                                                                                    | LC-MS               | <u>RPLC</u> : Zorbax 300SB-C18 column (1.0×150 mm, 3.5 µm); gradient elution at 0.05 mL/min flow rate and 40 °C; A: 0.1% HAc in H <sub>2</sub> O; B: 0.1% HAc in ACN; run time: 45 min<br><u>ESI-QTOF MS (neg&amp;pos)</u> : V <sub>cap</sub> – ±3.5 kV; nebulization with N <sub>2</sub> at 2 bar; dry gas flow – 5 L/min at 325°C; fragmentor voltage – 250 V (neg) and 360 V (pos)                                                                                                                                                                                                                                                                    | -                   | [77]    |
| <i>Patiria pectinifera</i>    | Profiling and structural characterization of polar steroid compounds                                                                     | Twenty fresh animals were chopped and extracted with EtOH                                                                                                                                                                | <u>SPE</u> : Strata-X (polymeric reversed-phase), 33 µm, 60 mg/3 mL                                                                                                                                                                                                                    | LC-MS               | <u>RPLC</u> : Zorbax 300SB-C18 column (2.1×250 mm, 5 µm); gradient elution at 0.15 mL/min flow rate and 40 °C; A: 0.1% HAc in H <sub>2</sub> O; B: 0.1% HAc in ACN; run time: 30 min                                                                                                                                                                                                                                                                                                                                                                                                                                                                     | -                   | [78,87] |

|                             |                                                                                                                      |                                                                                                                                                                                                                               |                                                                                                                                                                                |        |                                                                                                                                                                                                                                                                                                                                                              |       |         |
|-----------------------------|----------------------------------------------------------------------------------------------------------------------|-------------------------------------------------------------------------------------------------------------------------------------------------------------------------------------------------------------------------------|--------------------------------------------------------------------------------------------------------------------------------------------------------------------------------|--------|--------------------------------------------------------------------------------------------------------------------------------------------------------------------------------------------------------------------------------------------------------------------------------------------------------------------------------------------------------------|-------|---------|
|                             |                                                                                                                      |                                                                                                                                                                                                                               |                                                                                                                                                                                |        | ESI-OTOF MS (neg&pos): $V_{cap} - \pm 3.5$ kV; nebulization with N <sub>2</sub> at 2 bar; dry gas flow – 5 L/min at 325 °C; fragmentor voltage – 250 V (neg) and 360 V (pos); APPI-OTOF MS (neg): $V_{cap} - 1.5$ kV; nebulization with N <sub>2</sub> at 2 bar; dry gas flow – 7 L/min at 350 °C; vaporizer temperature – 350 °C; fragmentor voltage – 90 V |       |         |
| <i>Luidia senegalensis</i>  | Profiling and characterization of polar steroids                                                                     | Animals were chopped and extracted with 70% EtOH                                                                                                                                                                              | SPE: Chromabond C18 ec, 500 mg                                                                                                                                                 | LC-MS  | RPLC: Kinetex Core-Shell C18 column (2.1×100 mm, 1.7 µm); gradient elution at 0.2 mL/min flow rate; A: 0.1% FA in H <sub>2</sub> O; B: 0.1% FA in MeOH; run time: 10 min<br>ESI-IT MS (neg&pos): spray voltage – 5 kV; capillary voltage – 35 V                                                                                                              | -     | [88]    |
| <i>Lethasterias fusca</i>   | Profiling, structural characterization, and studying of distribution of polar steroid compounds                      | Five fresh animals were chopped and subjected to the triple extraction with EtOH; another five animals were dissected into body walls, gonads, stomach, coelomic fluid, and pyloric caeca and organs were extracted with EtOH | LLE: twice extraction with a solvent combination of CHCl <sub>3</sub> /MeOH/ H <sub>2</sub> O (8:4:3, v:v:v);<br>SPE: BondElut C18, 100 mg/1 mL                                | LC-MS  | nanoRPLC: Acclaim PepMap RSLC C18 column (75 µm×150 mm, 2 µm); gradient elution at 400 nL/min and 40 °C; A: 0.1% FA in H <sub>2</sub> O; B: 0.1% FA in ACN; run time: 81 min<br>ESI-OTOF MS (neg&pos): $V_{cap} - 1.3$ kV; dry gas flow – 3 L/min at 150 °C                                                                                                  | ANOVA | [79,87] |
| <i>Echinaster sepositus</i> | Structural characterization, studying of distribution and variation of asterosaponin composition                     | Animals were dissected into the stomach, pyloric caeca, gonads, aboral body wall, and oral body wall and extracted by microwave-assisted extraction with 60% MeOH                                                             | Similar to [2]                                                                                                                                                                 | ESI MS | ESI-QOrbitrap MS (neg&pos): spray voltage – 3–4 kV; capillary temperature – 300 °C; sheath gas flow rate – 10–80; auxiliary gas flow – 0–10                                                                                                                                                                                                                  | -     | [90]    |
| <i>Heliaster helianthus</i> | Characterization of the chemical composition of fractions that induced escape reactions and mortality in the limpets | Ten animals were dissected into arms and central disks and homogenized in EtOH                                                                                                                                                | LLE: partitioned successively against cyclohexane and <i>n</i> -BuOH;<br>Column chromatography: Sephadex LH-60 column (elution with MeOH:H <sub>2</sub> O (2:1) give fractions | ESI MS | ESI-OTOF MS (neg): $V_{cap} - 3.3$ kV; cone voltage – 30 V; desolvation temperature – 100 °C                                                                                                                                                                                                                                                                 | -     | [91]    |

| containing mixtures of polar steroids                                                                                                           |                                                                                                                                                     |                                                                                                                                                                                                                                                                              |                                                                                                                                                                                                                                                                         |                                                       |                                                                                                                                                                                                                                                                                                                                                                                                                                                                                                             |          |
|-------------------------------------------------------------------------------------------------------------------------------------------------|-----------------------------------------------------------------------------------------------------------------------------------------------------|------------------------------------------------------------------------------------------------------------------------------------------------------------------------------------------------------------------------------------------------------------------------------|-------------------------------------------------------------------------------------------------------------------------------------------------------------------------------------------------------------------------------------------------------------------------|-------------------------------------------------------|-------------------------------------------------------------------------------------------------------------------------------------------------------------------------------------------------------------------------------------------------------------------------------------------------------------------------------------------------------------------------------------------------------------------------------------------------------------------------------------------------------------|----------|
| Holothuroidea                                                                                                                                   |                                                                                                                                                     |                                                                                                                                                                                                                                                                              |                                                                                                                                                                                                                                                                         |                                                       |                                                                                                                                                                                                                                                                                                                                                                                                                                                                                                             |          |
| <i>Holothuria forskali</i>                                                                                                                      | Structural characterization of <i>H. forskali</i> triterpene glycosides and comparison of glycoside composition of body walls and Cuvierian tubules | Animals were dissected into the body wall and Cuvierian tubules; organs were homogenized and extracted twice with 70% EtOH                                                                                                                                                   | <u>LLE</u> : partitioned successively against <i>n</i> -hexane, CCl <sub>4</sub> , and CHCl <sub>3</sub> ; <u>Column chromatography</u> : Amberlite XAD-4 column (washing with H <sub>2</sub> O and elution with MeOH); <u>LLE</u> : partitioned against <i>i</i> -BuOH | LC-MS<br><br><br><br><br><br><br><br><br><br>MALDI MS | <u>RPLC</u> : Symmetry C18 column (4.6×150 mm, 5 µm); gradient elution at 1 mL/min flow rate and 27 °C; A: H <sub>2</sub> O; B: MeOH; run time: 15 min<br><u>ESI-QTOF MS (pos)</u> : V <sub>cap</sub> – 3.1 kV; cone voltage – 50 V; nebulization with N <sub>2</sub> ; desolvation temperature – 300 °C; source temperature – 120 °C<br><u>MALDI-QTOF MS (pos)</u> : nitrogen laser (337 nm); matrix – HCCA in acetone                                                                                     | - [92]   |
| <i>H. forskali</i>                                                                                                                              | Investigation of triterpene glycoside localization in the Cuvierian tubules and comparison data from stressed and relaxed animals                   | Relaxed animals were anesthetized in a 0.1% solution of 1-phenoxo-2-propanol in seawater. Stressed individuals were mechanically disturbed by repetitive hitting. Cuvierian tubules from relaxed and stressed animals were collected and prepared for MALDI MS and MALDI MSI | Samples for MALDI MS were prepared similarly to [2]                                                                                                                                                                                                                     | MALDI MS                                              | MALDI-TOF/TOF MS (pos): Smartbeam (Nd-YAG, 355 nm) laser; matrix – HCCA in ACN/aqueous TFA 0.1% (6:4, v/v) with the addition of N,N-dimethylaniline. MALDI MSI (pos): the 12 µm sections were obtained from the frozen bundle of Cuvierian tubules using cryostat microtome and placed onto an ITO-coated glass slide; Smartbeam (Nd-YAG, 355 nm) laser; matrix – HCCA in ACN/aqueous TFA 0.1% (6:4, v/v) with the addition of N,N-dimethylaniline; the spatial resolution was set to 60×60 mm <sup>2</sup> | PCA [93] |
| <i>H. atra</i> ,<br><i>H. leucospilota</i> ,<br><i>Pearsonothuria graeffei</i> ,<br><i>Actinopyga echinites</i> ,<br><i>Bohadschia subrubra</i> | Profiling of triterpene glycosides in body walls and Cuvierian tubules of five tropical sea cucumber species                                        | Animals were dissected into the body wall and Cuvierian tubules; organs were homogenized and extracted twice with 70% EtOH                                                                                                                                                   | Similar to [2]                                                                                                                                                                                                                                                          | LC-MS<br><br><br><br><br><br><br><br><br><br>MALDI MS | <u>RPLC</u> : Symmetry C18 column (4.6×150 mm, 5 µm); gradient elution at 1 mL/min flow rate and 27 °C; A: H <sub>2</sub> O; B: MeOH; run time: 15 min<br><u>ESI-QTOF MS (pos)</u> : V <sub>cap</sub> – 3.1 kV; cone voltage – 50 V; nebulization with N <sub>2</sub> ; desolvation temperature – 300 °C; source temperature – 120 °C<br><u>MALDI-QTOF MS (pos)</u> : nitrogen laser (337 nm); matrix – HCCA in acetone                                                                                     | - [94]   |
| <i>H. forskali</i>                                                                                                                              | Characterization of body wall triterpene glycosides, studying of                                                                                    | Relaxed animals were anesthetized in a 0.1% solution of 1-                                                                                                                                                                                                                   | Similar to [2]                                                                                                                                                                                                                                                          | MALDI MS                                              | <u>MALDI MSI</u> : similar to [12]<br><u>MALDI, ESI, and RPLC-ESI MS</u> : similar to [11]                                                                                                                                                                                                                                                                                                                                                                                                                  | - [95]   |

|                                                                       |                                                                                                                                                     |                                                                                                                                                                                                                                                                                                     |                                                                                                                                                                                                                                                                 |                       |                                                                                                                                                                                                                                                                                                                                                                                                             |                                            |      |
|-----------------------------------------------------------------------|-----------------------------------------------------------------------------------------------------------------------------------------------------|-----------------------------------------------------------------------------------------------------------------------------------------------------------------------------------------------------------------------------------------------------------------------------------------------------|-----------------------------------------------------------------------------------------------------------------------------------------------------------------------------------------------------------------------------------------------------------------|-----------------------|-------------------------------------------------------------------------------------------------------------------------------------------------------------------------------------------------------------------------------------------------------------------------------------------------------------------------------------------------------------------------------------------------------------|--------------------------------------------|------|
|                                                                       | their localization in the tissue, and investigation of the release of glycosides by the animal in its surroundings                                  | phenoxy-2-propanol in seawater. Stressed individuals were mechanically disturbed by repetitive hitting. Cuvierian tubules from relaxed and stressed animals were collected and prepared for MALDI, ESI MS, and MALDI MSI. Extraction from the body wall and Cuvierian tubules was similarly to [11] |                                                                                                                                                                                                                                                                 |                       |                                                                                                                                                                                                                                                                                                                                                                                                             |                                            |      |
| <i>H. scabra</i> ,<br><i>H. impatiens</i> ,<br><i>H. fuscocinerea</i> | Characterization of triterpene glycosides and comparison of body wall composition from three tropical holothurians species                          | Sea cucumbers were dissected and body walls from each species (5–7 samples) were homogenized and extracted twice with 70% EtOH                                                                                                                                                                      | <u>LLE</u> : partitioned successively against <i>n</i> -hexane, CH <sub>2</sub> Cl <sub>2</sub> , CHCl <sub>3</sub> , and <i>i</i> -BuOH;<br><u>HPLC fractionation</u> : C18 column (4.6 × 150 mm, 5 µm); gradient elution using 10% MeOH (A) and 100% MeOH (B) | LC-MS<br><br>MALDI MS | <u>nanoRPLC</u> : C18 microfluidic chip with an enrichment column (40 nL) and analytical column (0.075×43 mm); gradient elution at 300 nL/min; A: 0.1% FA in 10% MeOH; B: 0.1% FA in MeOH; run time: 45 min<br><u>ESI-QTOF MS (pos)</u><br><u>MALDI-FTICR MS (pos&amp;neg)</u> : neodymium-doped yttrium aluminum garnet laser (355 nm); matrix – 2,5-DHB in H <sub>2</sub> O/ACN with the addition of NaCl | -                                          | [96] |
| <i>H. scabra</i>                                                      | Characterization of triterpene glycosides in the body wall of <i>H. scabra</i> and comparison with glycoside composition of processed sea cucumbers | Three fresh animals were eviscerated and their body walls were homogenized in MeOH                                                                                                                                                                                                                  | Similar to [2]                                                                                                                                                                                                                                                  | MALDI MS              | <u>MALDI-QTOF MS (pos)</u> : nitrogen laser (337 nm); matrix – 2,5-DHB in H <sub>2</sub> O/ACN with the addition of <i>N,N</i> -dimethylaniline                                                                                                                                                                                                                                                             | Non-parametric statistic Mann-Whitney test | [97] |
| <i>H. sanctori</i>                                                    | Characterization of triterpene glycoside composition in the body wall and Cuvierian tubules of <i>H. sanctori</i>                                   | Four fresh animals were dissected into the body wall and Cuvierian tubules and extracted with MeOH                                                                                                                                                                                                  | Similar to [2]                                                                                                                                                                                                                                                  | MALDI MS              | <u>MALDI-QTOF MS (pos)</u> : nitrogen laser (337 nm); matrix – 2,5-DHB in H <sub>2</sub> O/ACN with the addition of <i>N,N</i> -dimethylaniline                                                                                                                                                                                                                                                             | -                                          | [98] |
| <i>Eupentacta fraudatrix</i>                                          | Profiling, structural characterization, and studying of distribution                                                                                | Seven fresh animals were chopped and subjected to the triple                                                                                                                                                                                                                                        | <u>SPE</u> : BondElut C18, 100 mg/1 mL                                                                                                                                                                                                                          | LC-MS                 | <u>RPLC</u> : Zorbax Eclipse XDB-C18 column (1.0×150 mm, 3.5 µm); gradient elution at 0.1 mL/min flow rate and 40 °C; A: 0.1% FA in H <sub>2</sub> O; B: 0.1% FA in MeOH; run time: 38                                                                                                                                                                                                                      | -                                          | [99] |

|                        |                                                                                                                                |                                                                                                                                                                                                 |                                                                                                          |          |                                                                                                                                                                                                                                                                                                                                                                                                                                                                                                                                                                   |   |       |
|------------------------|--------------------------------------------------------------------------------------------------------------------------------|-------------------------------------------------------------------------------------------------------------------------------------------------------------------------------------------------|----------------------------------------------------------------------------------------------------------|----------|-------------------------------------------------------------------------------------------------------------------------------------------------------------------------------------------------------------------------------------------------------------------------------------------------------------------------------------------------------------------------------------------------------------------------------------------------------------------------------------------------------------------------------------------------------------------|---|-------|
|                        | of triterpene glycosides                                                                                                       | extraction with EtOH; another seven animals were dissected into respiratory trees, body walls, gonad tubules, guts, and aquapharyngeal bulbs. Separate organs were extracted with EtOH          |                                                                                                          |          | min                                                                                                                                                                                                                                                                                                                                                                                                                                                                                                                                                               |   |       |
|                        |                                                                                                                                |                                                                                                                                                                                                 |                                                                                                          |          | <u>ESI-QTOF MS (neg&amp;pos)</u> : $V_{cap} - \pm 4.0$ kV; nebulization with $N_2$ at 0.8 bar; dry gas flow – 7 L/min at 200 °C                                                                                                                                                                                                                                                                                                                                                                                                                                   |   |       |
| <i>H. scabra</i>       | Studying the chemical composition of triterpene glycosides released in surrounding seawater by <i>H. scabra</i>                | <i>H. scabra</i> body wall were gently pinched to facilitate the release of compounds into a small volume (1 mL) of filtered seawater                                                           | <u>SPE</u> : Sep-Pak C18                                                                                 | LC-MS    | <u>RPLC</u> : Poroshell 120 EC-C18 column (4.6×150 mm, 2.7 $\mu$ m); gradient elution at 0.2 mL/min flow rate; A: 0.1% FA in $H_2O$ ; B: 0.1% FA in ACN; run time: 35 min                                                                                                                                                                                                                                                                                                                                                                                         | - | [100] |
|                        |                                                                                                                                |                                                                                                                                                                                                 |                                                                                                          |          | multimode source-QTOF MS                                                                                                                                                                                                                                                                                                                                                                                                                                                                                                                                          |   |       |
| <i>H. forskali</i>     | Investigation of composition and distribution of triterpene glycosides of <i>H. forskali</i>                                   | Animals were dissected into body walls, gonads, and Cuvierian tubules and homogenized in MeOH                                                                                                   | <u>LLE</u> : partitioned successively against <i>n</i> -hexane, $CH_2Cl_2$ , $CHCl_3$ and <i>i</i> -BuOH | LC-MS    | <u>RPLC</u> : Eclipse plus C18 column (4.6×100 mm, 3.5 $\mu$ m); isocratic elution at 1 mL/min flow rate and 40 °C of 40% B; A: 0.1% FA in $H_2O$ ; B: ACN; run time: 15 min<br><u>ESI-QQQ MS (pos)</u> : $V_{cap} - 3.1$ kV; cone voltage – 40 V; source temperature – 100 °C; desolvation temperature – 300 °C nebulization with $N_2$ at 50 L/h for the gas cone and 500 L/h for the desolvation gas;<br><u>LC-IMS-QTOF-MS</u> : $V_{cap} - 2.5$ kV; sampling cone – 40 V; source offset – 80 V; source temperature – 150 °C; desolvation temperature – 300 °C | - | [101] |
|                        |                                                                                                                                |                                                                                                                                                                                                 |                                                                                                          | MALDI MS | <u>MALDI-QTOF MS</u> : Nd-YAG laser (355 nm); matrix – 2,5-DHB in $H_2O$ /ACN with the addition of <i>N,N</i> -dimethylaniline                                                                                                                                                                                                                                                                                                                                                                                                                                    |   |       |
| <i>H. leucospilota</i> | Characterization of compositions and spatial distributions of triterpene glycosides in the body wall of <i>H. leucospilota</i> | Body wall extract: freeze-dried and grounded <i>H. leucospilota</i> body walls were extracted three times with 70% EtOH. Epidermis extract: pieces of the epidermal layer were separated from a | <u>LLE</u> : partitioned successively against $CH_2Cl_2$ , EtOAc, and <i>n</i> -BuOH                     | MALDI MS | <u>MALDI-TOF/TOF MS (pos)</u> : matrix – 2,5-DHB in 70% MeOH with 0.1% TFA;<br><u>MALDI-TOF/TOF MSI (pos)</u> : carboxymethyl cellulose was used as an embedding medium of the body wall; the 20 $\mu$ m sections were cut using cryostat microtome and placed onto an ITO-coated glass slide; matrix – 2,5-DHB in 0.1% TFA in MeOH/ $H_2O$ (7:3, <i>v:v</i> )                                                                                                                                                                                                    | - | [102] |

| thick dermis and<br>extracted with H <sub>2</sub> O or <i>n</i> -<br>BuOH                                                                                |                                                                                                                                                                             |                                                                                                                                                   |                                                                                                                                                                                                                                                                                                                               |       |                                                                                                                                                                                                                                                                                                                                                                                                                                                                                                       |                                               |       |
|----------------------------------------------------------------------------------------------------------------------------------------------------------|-----------------------------------------------------------------------------------------------------------------------------------------------------------------------------|---------------------------------------------------------------------------------------------------------------------------------------------------|-------------------------------------------------------------------------------------------------------------------------------------------------------------------------------------------------------------------------------------------------------------------------------------------------------------------------------|-------|-------------------------------------------------------------------------------------------------------------------------------------------------------------------------------------------------------------------------------------------------------------------------------------------------------------------------------------------------------------------------------------------------------------------------------------------------------------------------------------------------------|-----------------------------------------------|-------|
| <i>H. atra</i>                                                                                                                                           | Studying triterpene glycosides composition of <i>H. atra</i> by a combined approach including LC-MS/MS, Molecular Networking, pure compound isolation, and NMR spectroscopy | Fresh animals were chopped, freeze-dried, and extracted four times with EtOAc/MeOH (1:1, <i>v:v</i> )                                             | <u>LLE</u> : partitioned successively against hexane, CH <sub>2</sub> Cl <sub>2</sub> , and butanol                                                                                                                                                                                                                           | LC-MS | <u>RPLC</u> : Kinetex PFP column (2.1×100 mm, 5 µm); gradient elution at 0.2 mL/min flow rate; A: 0.1% FA in H <sub>2</sub> O; B: MeOH; run time: 33 min<br><u>ESI-QOrbitrap MS (pos&amp;neg)</u> : spray voltage – 3 kV; capillary temperature – 280°C; sheath gas (N <sub>2</sub> ) flow rate – 40 unit; auxiliary gas (N <sub>2</sub> ) flow rate – 1.0 unit                                                                                                                                       | Molecular Networking                          | [103] |
| <i>Apostichopus japonicus</i>                                                                                                                            | Characterization of the chemical composition of triterpene glycoside fraction from red and black types of <i>A. japonicus</i>                                               | Sea cucumbers were dissected and body walls of different types of <i>A. japonicus</i> were extracted twice with 70% EtOH in a water bath at 90 °C | <u>LLE</u> : partitioned successively against hexane, CHCl <sub>3</sub> , EtOAc, and <i>n</i> -BuOH                                                                                                                                                                                                                           | LC-MS | <u>RPLC</u> : Synchronis C18 column (2.1×100 mm, 1.7 µm); gradient elution at 0.2 mL/min flow rate and 35 °C; A: 0.1% FA in H <sub>2</sub> O; B: ACN; run time: 40 min<br><u>ESI-QOrbitrap MS (neg)</u> : mass resolution – 70,000 FWHM; injection time – 200 ms                                                                                                                                                                                                                                      | Student's <i>t</i> -test                      | [104] |
| <i>H. polii</i> ,<br><i>H. leucospilota</i> ,<br><i>H. atra</i> ,<br><i>H. edulis</i> ,<br><i>Bohadschia marmorata</i> ,<br><i>Actinopyga mauritiana</i> | Metabolomic profiling and comparison of chemical compositions of extracts from the sea cucumbers inhabiting either Red or the Mediterranean Seashore                        | Sea cucumbers were dissected and body walls from each species (3 samples) were homogenized and extracted twice with 96% EtOH                      | LLE: extraction with a solvent combination of MTBE/MeOH/H <sub>2</sub> O; the upper non-polar phase was re-suspended in <i>i</i> -Pro/ACN (3:7, <i>v:v</i> ) and used for the analysis of the lipid content; the lower polar phase was re-suspended in MeOH and used for the analysis of the triterpene glycoside composition | LC-MS | <u>RPLC polar fraction</u> : ACQUITY HSS T3 column (2.1×100 mm, 1.7 µm); gradient elution at 0.4 mL/min flow rate; A: 0.1% FA in H <sub>2</sub> O; B: 0.1% FA in CAN; run time: 17 min<br><u>RPLC non-polar fraction</u> : Acquity BEH C8 column (2.1×100 mm, 1.7 µm); gradient elution at 0.4 mL/min flow rate; A: 0.1% Hac, 1% 1M NH <sub>4</sub> Ac in H <sub>2</sub> O; B: 0.1% Hac, 1% 1M NH <sub>4</sub> Ac in ACN/ <i>i</i> Pro(7:3); run time: 17 min<br><u>ESI-Orbitrap MS (pos&amp;neg)</u> | PCA, heat maps and dendrogram representations | [105] |
| <i>H. whitmaei</i> ,<br><i>H. hilla</i> ,<br><i>H. atra</i>                                                                                              | Profiling and characterization of the chemical composition of                                                                                                               | Freeze-dried and grounded tissue samples were twice extracted                                                                                     | To analyze the content of crude extracts samples were dissolved in MeOH.                                                                                                                                                                                                                                                      | LC-MS | <u>RPLC</u> : Acquity BEH C18 column (2.1×50 mm, 1.7 µm); gradient elution at 0.6 mL/min flow rate and 40 °C; A: 0.1% FA in H <sub>2</sub> O; B: 0.1% FA in ACN; run time: 28.5 min                                                                                                                                                                                                                                                                                                                   | Kruskal-Wallis test                           | [106] |

|                                                                                                                                                                                |                                                                                                                   |                                                                                                                                     |                                                                                                                                                                                                                                                                                                                          |                   |                                                                                                                                                                                                                                                                                                                                                             |   |       |
|--------------------------------------------------------------------------------------------------------------------------------------------------------------------------------|-------------------------------------------------------------------------------------------------------------------|-------------------------------------------------------------------------------------------------------------------------------------|--------------------------------------------------------------------------------------------------------------------------------------------------------------------------------------------------------------------------------------------------------------------------------------------------------------------------|-------------------|-------------------------------------------------------------------------------------------------------------------------------------------------------------------------------------------------------------------------------------------------------------------------------------------------------------------------------------------------------------|---|-------|
| <i>H. edulis</i> ,<br><i>Bohadschia</i><br><i>argus</i> ,<br><i>B. vittensis</i> ,<br><i>Bohadschia</i> sp.<br><i>Actinopyga</i><br><i>echinites</i> ,<br><i>A. mauritiana</i> | anti-fouling extracts of<br>sea cucumbers                                                                         | with EtOAc/MeOH (1:1,<br><i>v:v</i> ) followed by MeOH<br>extraction                                                                | Sample Fractionation:<br><u>LLE</u> : partitioned<br>successively against<br>EtOAc/H <sub>2</sub> O (1:1, <i>v:v</i> ) and<br><i>n</i> -BuOH/H <sub>2</sub> O (1:1, <i>v:v</i> );<br><u>SPE</u> : Supelclean LC-18, 60<br>mL/10 g;<br><u>Semi-preparative HPLC</u> :<br>Pursuit XRs C18 column<br>(10×250 mm, 5 μm)      | ESI-QTOF MS (pos) |                                                                                                                                                                                                                                                                                                                                                             |   |       |
| <i>H. scabra</i>                                                                                                                                                               | Profiling and<br>characterization of<br>triterpene glycoside<br>composition of the<br>viscera of <i>H. scabra</i> | Dried viscera comprising<br>the intestinal tube, the<br>respiratory trees, and the<br>gonads were ground and<br>extracted with MeOH | <u>LLE</u> : partitioned<br>successively against <i>n</i> -<br>hexane, CHCl <sub>3</sub> , CH <sub>2</sub> Cl <sub>2</sub> , and<br><i>i</i> -BuOH Fractionation by<br>flash chromatography on a<br>non-polar column (Büchi<br>Cartouche FlashPure ID<br>C18-WP Flash) followed by<br>partitioning against<br>isobutanol | LC-MS             | <u>RPLC</u> : Acquity UPLC BEH C18 column (2.1×50 mm, 1.7<br>μm); gradient elution at 0.25 mL/min flow rate and 40<br>°C; A: 0.1% FA in H <sub>2</sub> O; B: ACN; run time: 15 min<br><u>ESI-QTOF-MS (pos)</u> : V <sub>cap</sub> – 3.1 kV; sampling cone – 40 V;<br>source offset – 80 V; source temperature – 120 °C;<br>desolvation temperature – 300 °C | - | [107] |
|                                                                                                                                                                                |                                                                                                                   |                                                                                                                                     |                                                                                                                                                                                                                                                                                                                          | MALDI<br>MS       | <u>MALDI-QTOF MS (pos)</u> : Nd-YAG laser (355 nm); matrix<br>– 2,5-DHB in H <sub>2</sub> O/ACN with the addition of <i>N,N</i> -<br>dimethylaniline;                                                                                                                                                                                                       |   |       |



**Table S2.** Instrumental and methodological details of MS-based applications for the analysis of starfish and sea cucumber lipids.

| Species                                                                                                       | Research focus                                                                                                                                              | Extraction                                                                                                                                                           | Purification and desalting                                                                                                                                                                                                                                                                                                            | Analytical approach | Separation and MS detection conditions                                                                                                                                                                                                                                                                                                                                                                            | Statistical methods | Ref.  |
|---------------------------------------------------------------------------------------------------------------|-------------------------------------------------------------------------------------------------------------------------------------------------------------|----------------------------------------------------------------------------------------------------------------------------------------------------------------------|---------------------------------------------------------------------------------------------------------------------------------------------------------------------------------------------------------------------------------------------------------------------------------------------------------------------------------------|---------------------|-------------------------------------------------------------------------------------------------------------------------------------------------------------------------------------------------------------------------------------------------------------------------------------------------------------------------------------------------------------------------------------------------------------------|---------------------|-------|
| <i>Acaudina molpadioides</i> ,<br><i>Cucumaria frondosa</i> ,<br><i>Apostichopus japonicus</i>                | Profiling and annotation of cerebrosides from three species of edible sea cucumbers                                                                         | Dried sea cucumber body walls were homogenized and extracted four times with CHCl <sub>3</sub> /MeOH (2:1, <i>v:v</i> ).                                             | <u>LLE</u> : extracted three times with EtOAc/ <i>n</i> -BuOH (2:1, <i>v:v</i> );<br><u>Column chromatography</u> : silica gel column (solvent CHCl <sub>3</sub> /MeOH/H <sub>2</sub> O, 95:5:0 to 5:5:1, <i>v:v:v</i> ) followed by separation on silica gel column with solvent CHCl <sub>3</sub> /MeOH (25:1 to 10:1, <i>v:v</i> ) | LC-MS               | <u>RPLC</u> : TSK gel ODS-100Z column (2.0×50 mm, 3 μm); isocratic elution with acetonitrile/water (95/5, <i>v:v</i> ) at 0.2 mL/min flow rate and 25 °C; run time: 30 min<br><br><u>ESI-IT-TOF MS (pos)</u> : probe voltage - 4.50 kV; curved desolvation line and a block heater temperatures - 200 °C; nebulizing gas (N <sub>2</sub> ) flow rate - 1.5 L/min; drying gas (N <sub>2</sub> ) pressure - 0.1 MPa | -                   | [143] |
| <i>A. japonicus</i> ,<br><i>Thelenota ananas</i> ,<br><i>A. molpadioides</i> ,<br><i>Bohadschia marmorata</i> | Detection and structural characterization of cerebrosides from four species of sea cucumbers                                                                | Dried sea cucumber body walls were homogenized and extracted four times with CHCl <sub>3</sub> /MeOH (2:1, <i>v:v</i> ).                                             | Dried extracts were saponified in 4 M KOH in methanol followed by LLE with CHCl <sub>3</sub> /MeOH/H <sub>2</sub> O;<br><u>SPE</u> : Supelclean ENVI-18, gradient elution using solvent CHCl <sub>3</sub> /MeOH (100:0 to 0:100, <i>v:v</i> )                                                                                         | LC-MS               | <u>RPLC</u> : Agilent Plus C18 column (2.1×100 mm, 3.5 μm); isocratic elution with 95 % MeOH with 5 mM ammonium acetate and 0.05 % HAc at 0.2 mL/min flow rate and 30 °C<br><br><u>ESI-QTOF MS (pos)</u> : V <sub>cap</sub> - 3.5 kV; nebulization with N <sub>2</sub> at 2.1 bar; dry gas flow - 5 L/min at 280 °C; sheath gas flow - 11 L/min at 280 °C; nozzle voltage - 500 V; fragmentor voltage - 135 V     | -                   | [59]  |
| <i>Pearsonothria graeffei</i>                                                                                 | Investigation and identification of cerebroside molecular species from the <i>P. graeffei</i>                                                               | Dried sea cucumber body walls were homogenized and extracted five times with CHCl <sub>3</sub> /MeOH (2:1, <i>v:v</i> ).                                             | Dried extracts were saponified in 4 M KOH in methanol followed by LLE CHCl <sub>3</sub> /MeOH/H <sub>2</sub> O<br><u>SPE</u> : silica gel column, gradient elution using solvent CHCl <sub>3</sub> /MeOH                                                                                                                              | LC-MS               | Similar to [28]                                                                                                                                                                                                                                                                                                                                                                                                   | -                   | [144] |
| <i>Cucumaria frondosa</i>                                                                                     | Profiling, annotation, and investigation of the relationship between structure and activity of cerebrosides, ceramides, and sphingosines of sea cucumber C. | Cerebroside: dried sea cucumber body walls were homogenized and extracted by high-speed counter-current chromatography (HSCCC).<br>Ceramide: sea cucumber body walls | Ceramides: LLE, three times with EtOAc/ <i>n</i> -BuOH (2:1, <i>v:v</i> ) followed by separation on silica gel column with solvent 95% MeOH                                                                                                                                                                                           | LC-MS (Cer.)        | <u>RPLC</u> : Agilent Plus C18 column (2.1×100 mm, 3.5 μm); isocratic elution with 95 % MeOH with 5 mM ammonium acetate and 0.05 % HAc at 0.2 mL/min flow rate and 30 °C<br><br><u>HESI-QOrbitrap MS (pos)</u> : ionization voltage - 3.5 kV; sheath gas - 30 arbitrary units; auxiliary gas - 10 arbitrary units; spray voltage - 3.5 kV; capillary temperature - 350 °C                                         | ANOVA<br><br>-      | [145] |

|                                                                                                                                                                   |                                                                                                            |                                                                                                                                                                  |                                                                                                                                  |                 |                                                                                                                                                                                                                                                                                                                                                                                                                                                                                                                   |                       |       |
|-------------------------------------------------------------------------------------------------------------------------------------------------------------------|------------------------------------------------------------------------------------------------------------|------------------------------------------------------------------------------------------------------------------------------------------------------------------|----------------------------------------------------------------------------------------------------------------------------------|-----------------|-------------------------------------------------------------------------------------------------------------------------------------------------------------------------------------------------------------------------------------------------------------------------------------------------------------------------------------------------------------------------------------------------------------------------------------------------------------------------------------------------------------------|-----------------------|-------|
|                                                                                                                                                                   | <i>frondosa</i>                                                                                            | were homogenized and extracted three times with CHCl <sub>3</sub> /MeOH/H <sub>2</sub> O (4:4:1, <i>v:v:v</i> ).                                                 |                                                                                                                                  | LC-MS (Sphing.) | <u>RPLC</u> : Agilent Plus C18 column (2.1×100 mm, 3.5 μm); isocratic elution with 98 % MeOH with 5 mM ammonium acetate and 0.05 % HAc at 0.2 mL/min flow rate and 30 °C<br><u>ESI-QQQ MS</u> : nebulization at 40 psi; dry gas (N <sub>2</sub> ) at 350 °C; carrier gas flow - 8 L/min; fragmentor voltage - 200 V; collision energy - 30 eV                                                                                                                                                                     |                       |       |
| <i>Asterias amurensis</i>                                                                                                                                         | Profiling and characterization of cerebroside from starfish <i>A. amurensis</i>                            | Whole bodies of starfish and organs, were extracted following the Bligh and Dyer method (extraction with CHCl <sub>3</sub> /MeOH/H <sub>2</sub> O)               | <u>Column chromatography</u> : silica gel column eluted with CHCl <sub>3</sub> /MeOH/H <sub>2</sub> O (90:10:0.1, <i>v:v:v</i> ) | LC-MS           | <u>RPLC</u> : Inertsil ODS-3 column (4.6×250 mm); isocratic elution with 98 % MeOH at 0.9 mL/min flow rate<br><u>ESI-IT-TOF MS (pos)</u> : ion source gas (N <sub>2</sub> ) flow - 1.5 L/min; dry gas pressure - 155 kPa; interface voltage - 4.5 kV; curved dissolved line and heat block temperatures - 200 °C                                                                                                                                                                                                  | -                     | [146] |
|                                                                                                                                                                   |                                                                                                            |                                                                                                                                                                  |                                                                                                                                  | ESI MS          | <u>ESI-IT-MS (pos)</u> : ion source gas (N <sub>2</sub> ) pressure - 8.0 psi; dry gas flow - 5.0 L/min at 220 °C                                                                                                                                                                                                                                                                                                                                                                                                  |                       |       |
|                                                                                                                                                                   |                                                                                                            |                                                                                                                                                                  |                                                                                                                                  | MALDI MS        | <u>MALDI-TOF MS (pos)</u> : Nd-YAG (355 nm) laser; matrix: 2,5-DHB                                                                                                                                                                                                                                                                                                                                                                                                                                                |                       |       |
| <i>Parastichopus californicus</i> ,<br><i>C. frondosa</i> ,<br><i>Isostichopus fuscus</i> , <i>Holothuria mexicana</i> , <i>H. polli</i> ,<br><i>B. marmorata</i> | Structural characterization and semiquantification of the phospholipid profile of six sea cucumber species | Dried sea cucumbers were extracted following the modified Bligh and Dyer method (extraction with CHCl <sub>3</sub> /MeOH/H <sub>2</sub> O)                       | Extracts were redissolved in <i>n</i> -hexane/ <i>i</i> -Pro (7:3, <i>v:v</i> )                                                  | LC-MS           | <u>NPLC</u> : Nucleosil 100-5OH column (3.0×250 mm, 5 μm); gradient elution at 0.5 mL/min flow rate and 35 °C; A: 1% FA, 0.08% NH <sub>4</sub> OH in <i>n</i> -hexane/ <i>i</i> -Pro (7:3, <i>v:v</i> ); B: 1% FA, 0.2% NH <sub>4</sub> OH in <i>i</i> -Pro/H <sub>2</sub> O (100:13, <i>v:v</i> ); run time: 50 min<br><u>ESI-Triple-TOF MS (neg)</u> : capillary voltage of -4.5kV; nebulizing gas pressure - 50 psi; heating gas pressure - 50 psi; curtain gas pressure - 35 psi; heater temperature - 500 °C | Heatmap visualization | [142] |
| <i>B. marmorata</i> ,<br><i>I. fuscus</i> , <i>H. polli</i> ,<br><i>H. mexicana</i> ,<br><i>C. frondosa</i> ,<br><i>P. californicus</i>                           | Structural characterization of the gangliosides of six sea cucumber species                                | Dried sea cucumber body walls were homogenized in H <sub>2</sub> O followed by extraction with a solvent combination of CHCl <sub>3</sub> /MeOH/H <sub>2</sub> O | <u>SPE</u> : Supelclean ENVI-8 cartridge                                                                                         | LC-MS           | <u>HILIC LC</u> : GOLD-amino column (2.1×100 mm, 1.7 μm); gradient elution at 0.35 mL/min flow rate and 40 °C; A: ACN; B: 5 mM ammonium acetate in H <sub>2</sub> O; run time: 30 min<br><u>HESI-OOorbitrap MS (neg)</u> : spray voltage - 3.2 kV; capillary temperature - 250; aux gas heater temperature - 350 °C                                                                                                                                                                                               | ANOVA                 | [147] |

**Table S3.** Instrumental and methodological details in metabolomics studies of starfish and sea cucumbers

| Species                       | Research focus                                                                                                                                                                                                 | Analytical approach | Statistical methods used for treatment of analytical data                             | Ref.  |
|-------------------------------|----------------------------------------------------------------------------------------------------------------------------------------------------------------------------------------------------------------|---------------------|---------------------------------------------------------------------------------------|-------|
| <i>P. pectinifera</i>         | Investigation the influence of different environmental factors such as water heating, oxygen deficiency, feeding, injury, and different water salinity on polar steroids of the starfish <i>P. pectinifera</i> | HPLC-QTOF MS        | ANOVA, PCA, PLS-DA,                                                                   | [87]  |
| <i>Apostichopus japonicus</i> | Investigation the influence of different environmental factors such as heat, hypoxia, and combined stress on metabolome of the sea cucumber <i>A. japonicus</i>                                                | UPLC-QTOF MS        | Student's <i>t</i> -test and fold change analysis, PCA, PLS-DA, heatmap visialization | [171] |
| <i>A. japonicus</i>           | Investigation the influence of acute hypoxia                                                                                                                                                                   | UPLC-QTOF MS        | PCA, PLS-DA, OPLS-DA                                                                  | [172] |
| <i>A. japonicus</i>           | Comparing the metabolic profiles of the thermotolerant strain and common <i>A. japonicus</i> under high temperature                                                                                            | GC-MS               | ANOVA                                                                                 | [173] |
| <i>A. japonicus</i>           | Metabolomic analysis of the coelomic fluids that were ejected by evisceration                                                                                                                                  | UPLC-MS             | fold-change analysis, <i>t</i> -test, PCA, OPLS-DA                                    | [47]  |
| <i>A. japonicus</i>           | Investigation of alterations in <i>A. japonicus</i> metabolome during the aestivation stage                                                                                                                    | UPLC-QTOF MS        | <i>t</i> -test                                                                        | [174] |
| <i>A. japonicus</i>           | Investigation of metabolic changes induced by skin ulceration syndrome                                                                                                                                         | UPLC-QTOF MS        | <i>t</i> -test, PCA, OPLS-DA                                                          | [175] |
| <i>A. japonicus</i>           | Investigation of metabolomic differences between cage-cultured, pond-cultured, and bottom-sowing <i>A. japonicus</i>                                                                                           | UPLC-QTOF MS        | <i>t</i> -test, OPLS-DA                                                               | [176] |
| <i>A. japonicus</i>           | Investigation of <i>A. japonicus</i> coelomic fluids of different sexes and reproductive states                                                                                                                | UPLC-QTOF MS        | Student's <i>t</i> -test, and fold change analysis, PCA and PERMANOVA tests           | [177] |
| <i>A. japonicus</i>           | Investigation of metabolic differences in the muscle tissue of animals between the nonbreeding and growth stages                                                                                               | UPLC-QTOF MS        | Student's <i>t</i> -test, ANOVA, OPLS-DA                                              | [178] |

|                     |                                                                                                                               |              |                                                                  |       |
|---------------------|-------------------------------------------------------------------------------------------------------------------------------|--------------|------------------------------------------------------------------|-------|
| <i>A. japonicus</i> | Comparing the metabolic profiles of four <i>A. japonicus</i> varieties (green, white, purple, and spiny)                      | UPLC-QTOF MS | <i>t</i> -test, PCA, OPLS-DA                                     | [179] |
| <i>A. japonicus</i> | Investigation of metabolic changes in white, green, and purple <i>A. japonicus</i> body walls during the pigmentation process | UPLC-QTOF MS | <i>t</i> -test, PCA, PLS-DA, OPLS-DA                             | [180] |
| <i>A. japonicus</i> | Investigation of metabolic changes in <i>A. japonicus</i> of different geographical origins                                   | UPLC-QTOF MS | <i>t</i> -test, PCA, OPLS-DA                                     | [181] |
| <i>A. japonicus</i> | Investigation of melatonin-induced metabolomic changes in muscle tissues of sea cucumber                                      | UPLC-QTOF MS | Student's <i>t</i> -test, and fold change analysis, PCA, PLS-DA, | [182] |
| <i>A. japonicus</i> | Investigation of metabolomic changes induced by pedal peptide-type neuropeptides                                              | UPLC-QTOF MS | Student's <i>t</i> -test, and fold change analysis, PCA, PLS-DA, | [183] |
